# Supplementary material
Source: publisher site journal article supplement (https://www.dovepress.com/get_supplementary_file.php?f=295041.docx)
Supplement: Supplementary file 1 [file get_supplementary_file.php]

SUPPLEMENTARY DATA

Jones et al

# **Ferric carboxymaltose for anemic perioperative populations: a systematic literature review of randomized controlled trials**

## **APPENDICES**

### **Appendix 1: Search Strategies**

**PubMed**

1. ('ferric carboxymaltose') AND (surg* OR periop* OR preop* OR postop*)

2. ("ferric carboxymaltose"[Supplementary Concept] OR ("ferric"[All Fields] AND "carboxymaltose"[All Fields]) OR "ferric carboxymaltose"[All Fields]) AND ("surgery"[Subheading] OR "Perioperative Care"[Mesh] OR "Perioperative Period"[Mesh] OR "Surgical Procedures, Operative"[Mesh] OR "Elective Surgical Procedures"[Mesh]) AND ("Randomized Controlled Trial"[Publication Type] OR "Comparative Study"[Publication Type] OR "Controlled Clinical Trial"[Publication Type]) NOT ("Animals"[Mesh] NOT ("Animals"[Mesh] AND "Humans"[Mesh]))

**Embase**

1. 'ferric carboxymaltose'/de

2. 'elective surgery'/exp

3. 'perioperative period'/exp

4. 'surgery'/exp

5. 2 or 3 or 4

6. 1 and 5

7. 'randomized controlled trial'/exp

8. ‘controlled clinical trial’/exp

9. ‘controlled study’/exp

10. ‘comparative study’/

11. 7 or 8 or 9 or 10

12. 6 and 11

13. limit 12 to ([young adult]/ or [adult]/ or [middle aged]/ or [aged]/ or [very elderly]/)

14. animal/exp not (human/exp and animal/exp)

15. 13 not 14

**The 15 excluded full-text articles had exclusion criteria of study design (n=6), study population (n=5), and study intervention (n=4).**

**Appendix 2: Adjudicated Quality of Evidence Assessments Support for Rationale**

| **Table 1. Quality of Evidence (GRADE) Assessment** | | | | | | | | |
| --- | --- | --- | --- | --- | --- | --- | --- | --- |
| **Outcome** | **Studies** | **Risk of bias** | **Inconsistency** | **Indirectness** | **Imprecision** | **Publication bias** | **Other considerations** | **Quality of Evidence** |
| ***Absolute or relative change in hemoglobin concentration*** | | | | | | | | |
| Rationale | **6/6** | 3/6 RCTs inadequately blinded outcome assessments; 4/6 RCTs inadequately blinded participants and personnel. The proportion of information from studies at high risk of bias is sufficient to affect the interpretation of results. | Positive effect demonstrated in 6/6 RCTs. Both clinical and methodologic heterogeneity are high. Therefore, some inconsistency exists. | Secondary endpoint in 4/6 studies (primary in 2/6) and therefore may not be powered appropriately. The intervention was given preop in 4/6 and postop in 2/6 studies. Difficult to make direct comparisons because of difference in comparators and populations. | 1 study terminated early; no CIs reported for 3/6 studies; wide CI/IQR for 3/6 studies. Insufficient sample sizes (<400 total) in 5/6 studies. | Undetected | There are potentially many subgroups in this analysis (eg, type of surgery, severity of condition, age) that may have affected findings that cannot be considered because of small sample sizes. | We have very little confidence in the effect estimate; the true effect is likely to be substantially different from the estimate of the effect.  There generally appears to be a consistent effect with low risk of AEs. Most articles report positive outlook on use in future similar patient populations. Patients appear neutral to positive. |
| ***Absolute or relative change in iron stores (serum ferritin)*** | | | | | | | | |
| Rationale | 6/6 | 3/6 RCTs inadequately blinded outcome assessments; 4/6 RCTs inadequately blinded participants and personnel. The proportion of information from studies at high risk of bias is sufficient to affect the interpretation of results. | Positive effect demonstrated in 6/6 RCTs. Both clinical and methodologic heterogeneity are high. Therefore, some inconsistency exists. | Secondary endpoint in 4/6 studies (primary in 1 study) and therefore not sufficiently powered. Difficult to make direct comparisons because of differences in comparators and populations. | 1 study terminated early; no CI reported for 3/6; wide CI/IQR range for 3/6 studies. Insufficient sample sizes (<400 total) in 5/6 studies. | Undetected | Selective reporting in 2/6 studies (TSAT/ferritin endpoint not prespecified). | We have very little confidence in the effect estimate; the true effect is likely to be substantially different from the estimate of the effect |
| ***Absolute or relative change in iron stores (TSAT)*** | | | | | | | | |
| Rationale | 5/6 | 3/5 RCTs inadequately blinded outcome assessments; 3/5 RCTs inadequately blinded participants and personnel. The proportion of information from studies at high risk of bias is sufficient to affect the interpretation of results | Positive effect demonstrated in 5/5 RCTs. Both clinical and methodologic heterogeneity are high. Therefore, some inconsistency exists | Secondary endpoint in most studies (primary in 1 study) and therefore not sufficiently powered. Difficult to make direct comparisons because of difference in comparators and populations | 1 study terminated early; no confidence interval reported for 3/5; wide CI/IQR for 2/5 studies. Insufficient sample sizes in each study (<400 total). | Undetected | Selective reporting in 2/6 studies (TSAT/ferritin endpoint not prespecified). | We have very little confidence in the effect estimate; the true effect is likely to be substantially different from the estimate of the effect. |
| ***Proportion of participants who received a perioperative ABT*** | | | | | | | | |
| Rationale | 6/6 | 3/6 RCTs inadequately blinded outcome assessments; the decision to transfuse at discretion of an unblinded surgeon; 4/6 RCTs had prespecified transfusion trigger. The proportion of information from studies at high risk of bias is sufficient to affect the interpretation of results. | Positive effect reported in 2/6 studies (no difference in 4/6 studies). Consistency in findings may be an artifact of the disease severity/age/complexity of the surgery. | Primary endpoint in 3/6; percentage of blood transfusions secondary endpoint in 2/6; number of transfused blood units primary endpoint (1/6); reported as an absolute number across all studies. Difference in populations and intervention schedules may have influenced outcome. | 1 study terminated early; no CI reported for 3/6; wide CI/IQR for 2/6. Uncertain if there was a large enough sample size despite a large enough number of events to calculate a precise effect estimate. Several studies had only 1 participant with the outcome of interest. | Undetected | **N/A** | We have very little confidence in the effect estimate; the true effect is likely to be substantially different from the estimate of the effect. The studies in this review looked at populations who had a large range of bleed/transfusion risk perioperatively. Need to assess ABT risk and adequately power the studies to detect sufficient number of events. Event may be too rare in some cases. |
| ***Proportion of participants who experienced adverse events*** | | | | | | | | |
| Rationale | 2/6 | 3/6 RCTs inadequately blinded outcome assessments; 4/6 RCTs inadequately blinded participants and personnel. The proportion of information from studies at high risk of bias is sufficient to affect the interpretation of results. | No SAE (3/6); no significant difference in safety reported for 5/6 studies. | Prespecified secondary endpoint (2/6). Safety was not assessed similarly within or between. Difficult to make a conclusion based on 2 studies; these studies also had different comparators. | 1 study terminated early. Not clear how safety was assessed. | Undetected | N/A | We have very little confidence in the effect estimate; the true effect is likely to be substantially different from the estimate of the effect. Lack of evidence, high inconsistency in reporting, high indirectness, and high imprecision. |
| ***Postoperative mortality*** | | | | | | | | |
| Rationale | Directly reported in 3/6 studies; indirectly in 3/6 as apparently no deaths occurred during follow-up. | 3/6 RCTs inadequately blinded outcome assessments; 4/6 RCTs inadequately blinded participants and personnel. The proportion of information from studies at high risk of bias is sufficient to affect the interpretation of results. | Results were not consistent; may be an artifact of severity of disease in population under study. | Not a surrogate outcome; prespecified secondary endpoint (2/3); all-cause (1/3); 30-day (1/3). Death is dichotomous; however, the assumption in 3/6 studies is that no one had died. | Insufficient number of events to make a conclusion. Not a primary outcome, so likely underpowered to observe the true effect. | Undetected | **N/A** | We have very little confidence in the effect estimate; the true effect is likely to be substantially different from the estimate of the effect. |
| ***Length of hospital stay*** | | | | | | | | |
| Rationale | 6/6 | 3/6 RCTs inadequately blinded outcome assessments; 4/6 RCTs inadequately blinded participants and personnel. The proportion of information from studies at high risk of bias is sufficient to affect the interpretation of results. | Both clinical and methodologic heterogeneity are high. Heterogeneity among healthcare systems may also have influenced this outcome. Inconsistent results. | Not a surrogate outcome; prespecified secondary endpoint in 2/6 studies. | Wide CIs present in most studies. | Undetected | **N/A** | We have very little confidence in the effect estimate; the true effect is likely to be substantially different from the estimate of the effect. |
| ***Any validated measure of quality of life*** | | | | | | | | |
| Rationale | 5/6 | 3/6 RCTs inadequately blinded outcome assessments; 4/6 RCTs inadequately blinded participants and personnel. The proportion of information from studies at high risk of bias is sufficient to affect the interpretation of results. | Both clinical and methodologic heterogeneity are high. Results reported inconsistently owing to different instruments. No difference of effect is consistent. | Surrogate marker; outcome not assessed similarly within and among studies, yielding very indirect comparisons. | Wide CIs present in most studies. Extreme imprecision present. Concentrated on certain subscores in some studies. | Undetected. | Selective reporting was present for this outcome in a few studies. | We have very little confidence in the effect estimate; the true effect is likely to be substantially different from the estimate of the effect. |

AE=adverse event; CI=confidence interval; IQR=interquartile range; RCT=randomized clinical trial; SAE=serious adverse event; TSAT=transferrin saturation.

#### **Appendix 3: Adjudicated Risk of Bias Assessments Support for Rationale**

| Bernabeu-Wittel M, Romero M, Ollero-Baturone M, et al. Ferric carboxymaltose with or without erythropoietin in anemic patients with hip fracture: a randomized clinical trial. Transfusion (Paris). 2016;56(9):2199-2211.1 | | |
| --- | --- | --- |
| Bias | Authors’ judgment (low, unclear, high) | Support for judgment |
| Random sequence generation (selection bias) | Low | “A randomization assignment list will be stratified by center. The randomization list for each center will be sent to the hospital Pharmacy Service at the time of the drug delivery.” (Details of the study methods published in Bernabeu-Wittel 2012)2    “The randomization assignment list was stratified by centers and performed by unequal blocks technique.” |
| Allocation concealment (selection bias) | Low | “The person responsible for clinical trials in the Pharmacy Service will be the one responsible for keeping the blinded assignment. The allocation and blinding will be done by masking the syringes of EPO/placebo and iron infusion in the Pharmacy Service of each of the participating centers. The highest quality standards for handling parenteral medications will be kept for the preparation of intravenous mixtures. FC will be performed using plastic bags and opaque infusion sets.” (Details of the study methods published in Bernabeu-Wittel 2012)2 |
| Blinding of participants and personnel (performance bias) | Low | “This was a multicenter, randomized, controlled, double-blind clinical trial of parallel groups, performed on adult patients admitted to hospital due to a HF.” |
| Blinding of outcome assessment (detection bias) | Unclear | No description of measures used to blind outcome assessment nor of effectiveness. |
| Incomplete outcome data (attrition bias) | Low | “Eight patients (2.64%) did not have surgery, and in 18 additional patients (5.9%), protocol violations were observed (eight patients were administered additional IV ferric sacharate, in five patients violations of inclusion or randomization were detected, and five patients did not receive the trial treatment). No violations regarding the qualitative RBC transfusion protocol were detected. We detected 26 patients (8.6%) with protocol deviations (22 received one RBC transfusion less than protocolized and four received one RBC transfusion more than protocolized). The distribution of all these incidences was similar in the three study arms.”    Losses to follow-up were disclosed. The attrition was reasonable and not expected to affect results. Adequate sample size above 87 was achieved for all groups. |
| Selective reporting (reporting bias) | Low | Both intention-to-treat and per protocol analyses were performed. |
| Other bias | Low | No other bias was detected. |

Page Break

| Bisbe E, Moltó L, Arroyo R, Muniesa JM, Tejero M. Randomized trial comparing ferric carboxymaltose vs oral ferrous glycine sulphate for postoperative anaemia after total knee arthroplasty.  Br J Anaesth. 2014;113(3):402-409.3 | | |
| --- | --- | --- |
| Bias | Authors’ judgment (low, unclear, high) | Support for judgment |
| Random sequence generation (selection bias) | Low | “Randomization was performed using a random number list that had been electronically generated before initiation of the study.” |
| Allocation concealment (selection bias) | Low | “Screening or treating physicians had no access to the randomization list. Treatment allocation was accessed only by the pharmacist after patient enrolment.”  Drug: single-blind / Questionnaire responses: analysis blind |
| Blinding of participants and personnel (performance bias) | High | “This study was designed as a prospective, single-blinded, randomized, controlled trial of patients who underwent TKA at the University Hospital Mar-Esperança, Barcelona, Spain.” |
| Blinding of outcome assessment (detection bias) | Low | “The recruitment team, physicians, and other medical staff involved in the conduct and evaluation of the questionnaires were blinded to the study treatment.” |
| Incomplete outcome data (attrition bias) | High | “Most enrolled patients [102 (83.6%)] had complete data sets available at the end of the study period.”    Attrition bias may exist since no description of the patients lost to follow-up was reported. |
| Selective reporting (reporting bias) | Low | “Of 197 pre-recruited patients, 161 underwent surgery, and of those, 122 (75.8%) fulfilling the inclusion criteria were enrolled (60 FCM, 62 FS) and analyzed according to the intention-to-treat principle.” |
| Other bias | Unclear | “Moreover, 40% of FCM-treated iron-deficient patients compared with only 8% of FS-treated iron-deficient patients achieved normal Hb levels. Iron-deficient patients who developed postoperative anaemia with Hb levels below 10 g/dL showed particular benefit from FCM; yet, the number of patients in this subgroup was already quite low. Notably, the low number of patients with both iron deficiency and severe postoperative anaemia might result from the thorough PBM programme established at our centre and should not be generalized.” |

Page Break

| Froessler B, Palm P, Weber I, Hodyl NA, Singh R, Murphy EM. the important role for intravenous iron in perioperative patient blood management in major abdominal surgery: a randomized controlled trial. Ann Surg. 2016;264(1):41-46.4 | | |
| --- | --- | --- |
| Bias | Authors’ judgment (low, unclear, high) | Support for judgment |
| Random sequence generation (selection bias) | High | “Randomization followed a computer-generated number sequence and allocation was conducted by telephone.”    “Another limitation is that we performed simple randomization instead of block randomization. This was apparent aat the time of the interim analysis and the final analysis after stopping the study. Block randomization would have achieved a more equal balance in the allocation of participants. In this study, 5 participants randomized to the usual care group received IV iron as part of their standard care. Although this may have influenced the results, the final analysis between groups would then represent a more conservative analysis of the effects of IV iron. This change in standard care of iron deficient patients further adds clarity to the decision for early termination.” |
| Allocation concealment (selection bias) | Low | “The surgeon performing the operation was informed of patient participation in the study but group allocation was not revealed.”    “Computer random number generator to give you the random sequence and then put this sequence in consecutively numbered opaque sealed envelopes to ensure allocation concealment.” (Australian New Zealand Clinical Trials Registry [ACTRN12611000387921]) |
| Blinding of participants and personnel (performance bias) | High | Open (masking not used) (Australia New Zealand Clinical Trial Registry [ACTRN12611000387921]) |
| Blinding of outcome assessment (detection bias) | High | Open (masking not used) (Australia New Zealand Clinical Trial Registry [ACTRN12611000387921]) |
| Incomplete outcome data (attrition bias) | Low | “An early interim data analysis was requested following concerns raised by the clinical investigator team after high rates of RBC transfusion, considered to be an independent risk factor for adverse clinical outcomes, noted after the 4-week follow-up in a subset of patients. This was performed by an independent statistician on the interim data-monitoring committee with the data blinded (intervention group n=32, usual care group n=26). The results of the interim analysis were forwarded to 2 independent experts in the field to assess safety concerns. Enrolment continued while waiting for a response. There was disagreement among the assessors, and a third independent expert opinion was sought. Based on advice from 2 of the 3 independent experts, the study was terminated early due to higher than expected rates of poor outcome in the usual care group.” |
| Selective reporting (reporting bias) | Low | Intention-to-treat analysis. All outcomes reported. |
| Other bias | unclear | “Despite sometimes longstanding and previously diagnosed IDA, only 3 patients in our entire cohort had been prescribed oral iron replacement therapy within the 6 weeks before surgery. Only 1 patient in the usual care group was treated with IV iron pre- and postoperatively, and 4 received IV iron while in hospital. IV iron was not considered usual care, at the time of study commencement, nonetheless was not prohibited.” |

Page Break

| Keeler BD, Simpson JA, Ng O, Padmanabhan H, Brookes MJ, Acheson AG. Randomized clinical trial of preoperative oral versus intravenous iron in anaemic patients with colorectal cancer. Br J Surg. 2017;104(3):214-221.5 | | |
| --- | --- | --- |
| Bias | Authors’ judgment (low, unclear, high) | Support for judgment |
| Random sequence generation (selection bias) | Low | “Recruited patients were randomized in a 1:1 fashion via a web-based system using variable block allocation, stratified by patient sex and age.” |
| Allocation concealment (selection bias) | Unclear | “The system was designed, set up and run by a unit independent of the study (Clinical Trials Unit, University of Nottingham).” |
| Blinding of participants and personnel (performance bias) | High | “Treatment allocation was open-label as it was not possible to conceal the darkening of stool when ingesting oral iron.” |
| Blinding of outcome assessment (detection bias) | Unclear | “The system was designed, set up and run by a unit independent of the study (Clinical Trials Unit, University of Nottingham).”    It is unclear who performed outcome assessments and if they differed from the ordering physicians. |
| Incomplete outcome data (attrition bias) | High | “Completion of the trial was defined as attendance at the final outpatient visit. However, patients were also deemed to have completed the trial in the following circumstances. First, if a patient was recruited to the study and failed to undergo resectional surgery, the patient completed the trial at the time of surgery. All data obtained to this point were included in the analysis. Alternatively, for patients who died before outpatient follow-up, or were lost to follow-up (for example owing to moving out of area), end of the trial was defined as the date of death or date of postoperative discharge from hospital.”    Reasons for attrition or exclusion were reported.    Incomplete outcome data: “The primary outcome examined was differences in the mean volume of allogeneic red blood cell transfusion administered from preoperative recruitment to postoperative outpatient department review. Secondary endpoints included changes in hemoglobin and hematinic profiles.”    Secondary outcomes: The treatment rise for hemoglobin was reported while the treatment rise for ferritin/TSAT was not reported.    Postoperative length of hospital stay and 90-day mortality rates were not prespecified outcomes but were listed under additional information as “All operative details were recorded.” |
| Selective reporting (reporting bias) | Low | “All analyses were by intention to treat.” |
| Other bias | Unclear | “A differential number of subjects in the study arms experienced protocol deviations (i.e., dose reductions/increases).”  “Preparation changed after 14 days.” |

Page Break

| Khalafallah AA, Yan C, Al-Badri R, et al. Intravenous ferric carboxymaltose versus standard care in the management of postoperative anaemia: a prospective, open-label, randomised controlled trial. Lancet Haematol. 2016;3(9):e415-e425.6 | | |
| --- | --- | --- |
| Bias | Authors’ judgment (low, unclear, high) | Support for judgment |
| Random sequence generation (selection bias) | High | “We randomly assigned patients who agreed to participate (1:1) to either the active treatment (ferric carboxymaltose infusion) group or the control (standard care) group using Excel 2007 (Microsoft, Redmond, WA, USA) within the Pharmacy Department of the Launceston General Hospital.” |
| Allocation concealment (selection bias) | Low | “To ensure allocation concealment, treatment codes were located in a central site, the pharmacy department. This department was not involved in any collection of trial data, follow-up, or patient activity to avoid possible bias. Randomization allocation was delivered by pharmacy in sealed numbered opaque envelopes that were opened consecutively after informed consent was obtained. Research assistants had no further role in data collection or management because these were done at the trial center with masking with regard to treatment allocation in the follow-up period.” |
| Blinding of participants and personnel (performance bias) | Unclear | No patient/personnel blinding for treatement. Nurses administering treatment may have caused more IV iron patients to stay in the study.  25% of the SOC group did not complete the QoL assessment. |
| Blinding of outcome assessment (detection bias) | High | “The corresponding author had full access to all the data in the study and had final responsibility for the decision to submit for publication.” |
| Incomplete outcome data (attrition bias) | Unclear | “The primary endpoints were the changes in hemoglobin concentration and iron stores (ferritin concentrations at 4 weeks postoperatively for both, and the number of transfused units of blood required postoperatively until discharge. The secondary outcomes of the trial were assessment of the safety and tolerability of ferric carboxymaltose, length of hospital stay, occurrence of infections and complications during admission in both groups, and the effect of the interventions on quality of life measured at 4 weeks and 12 weeks postoperatively.”    Efficacy measurements were not prespecified for hemoglobin concentration and iron stores at 12 weeks postoperatively, but were reported in Table 2.    Occurrences of complications were not reported.    Reasons for withdrawal not explained for either group. |
| Selective reporting (reporting bias) | Low | “We did all analysis on an intention-to-treat basis with imputation of missing SF36 assessments, but no imputation for entirely missing SF36 assessments.” |
| Other bias | Low | No other bias detected. |

Page Break

| Kim YW, Bae JM, Park YK, Yang HK, Yu W, Yook JH, et al. Effect of intravenous ferric carboxymaltose on hemoglobin response among patients with acute isovolemic anemia following gastrectomy the FAIRY randomized clinical trial. JAMA. 2017;317(20):2097-104.7 | | |
| --- | --- | --- |
| Bias | Authors’ judgment (low, unclear, high) | Support for judgment |
| Random sequence generation (selection bias) | Low | “Patients were stratified at each study site during randomization based on their clinical stage of gastric cancer (according to the American Joint Commission on Cancer tumor-node-metastasis [TNM] system): stage I (does not require adjuvant chemotherapy after gastrectomy) and stages II through IV (requires adjuvant or palliative chemotherapy after gastrectomy). Group allocation was randomly assigned (1:1) by a data management system (Velos eResearch, Velos). A random permutation method with block sizes 2, 4, and 6 were used.” |
| Allocation concealment (selection bias) | Unclear | “Group allocation was randomly assigned (1:1) by a data management system (Velos eResearch, Velos).” |
| Blinding of participants and personnel (performance bias) | High | “The randomized patients were blinded to their group allocation to minimize reporting bias for the QOL assessments. The intravenous line was covered with black vinyl to ensure patient blinding, and the placebo was administered over the equivalent period. The care of patients was standardized between the 2 groups, apart from the delivered treatment.”    The FAIRY trial was a patient-blinded, randomized, phase 3, placebo-controlled, 12-week study conducted  in 7 centers across the Republic of Korea. |
| Blinding of outcome assessment (detection bias) | High | “Acquisition, analysis, or interpretation of data: All authors.”    “The investigators will keep adequate records of the receipt, preparation and administration of the study drug.” |
| Incomplete outcome data (attrition bias) | Low | “The number of missing data was small (0.7% at week 3 and 1.8% at week 12) and therefore excluded from analysis. Modified intention-to-treat analysis, which excluded missing cases, was performed with the full analysis set, which involved patients who had results of at least 1 postbaseline hemoglobin measurement among the safety set.” |
| Selective reporting (reporting bias) | Low | All planned outcomes were reported.    Subgroup Analysis for Hemoglobin Responders Included in the Primary Analysis available in Supplement 3. |
| Other bias | Unclear | Unclear why the primary endpoint was a binary outcome as opposed to a continuous outcome as it is not the most conservative statistical approach. |

| Lee S, Ryu KJ, Lee ES, Lee KH, Lee JJ, Kim T. Comparative efficacy and safety of intravenous ferric carboxymaltose and iron sucrose for the treatment of preoperative anemia in patients with menorrhagia: An open-label, multicenter, randomized study. J Obstet Gynaecol Res. 2019;45(4):858-64.8 | | |
| --- | --- | --- |
| Bias | Authors’ judgment (low, unclear, high) | Support for judgment |
| Random sequence generation (selection bias) | Low | "Patients were randomized 1:1 by a computer randomization system to receive either intravenous FCM or IS." |
| Allocation concealment (selection bias) | Unclear | No further information about allocation concealment is provided. |
| Blinding of participants and personnel (performance bias) | High | This was an open-label study. |
| Blinding of outcome assessment (detection bias) | High | Open label study; assessors likely not blinded |
| Incomplete outcome data (attrition bias) | Unclear | "Analyses were based on the full analysis set. Missing data were interpolated using linear regression analysis.  Attrition and exclusions were not reported by intervention group." |
| Selective reporting (reporting bias) | Low | The endpoints "proportion of patients acheving Hg levels >10g/ dL within 2 weeks of first treatment, mean Hb levels, mean time to achieve Hb levels >10, and change in QoL are reported in Table 2 and Table 3 |
| Other bias | High | "Patients randomized to receive IS required up to three dosing visits per week, and they received a maximum of 600 mg iron per win in 200 mg iron single administration sessions. The patients in the FCM group received their maximum weekly  treatment in a single dose over 15 minutes.    The differential in time spent receiving treatments could potentially alter the outcome of one or more endpoint." |

| Padmanabhan H, Siau K, Nevill AM, Morgan I, Cotton J, Ng A, et al. Intravenous iron does not effectively correct preoperative anaemia in cardiac surgery: a pilot randomized controlled trial. Interact Cardiovasc Thorac Surg. 2019;28(3):447-54. 9 | | |
| --- | --- | --- |
| Bias | Authors’ judgment (low, unclear, high) | Support for judgment |
| Random sequence generation (selection bias) | Low | Patients were randomly allocated to receive either intravenous FCM or oral iron. Treatment allocation was decided by random number that were concealed in opaque envelopes. |
| Allocation concealment (selection bias) | Low | The concealment process was performed independently. |
| Blinding of participants and personnel (performance bias) | High | Study was non-blinded. |
| Blinding of outcome assessment (detection bias) | High | Open label study; assessors likely not blinded |
| Incomplete outcome data (attrition bias) | Unclear | In the oral iron group, the protocol was adhered to by 16 (67%) of the 24 patients. Five patients underwent surgery outside the 3- to 8-week protocol window, surgery was cancelled for 2 patients and 1 patient declined to be followed-up. In the IV iron group, the protocol was adhered to by 14 (54%) of the 26 patients. Surgery was delayed for 4 patients, 3 patients did not undergo surgery, 1 patient died before surgery, and 4 patients were lost to follow-up. |
| Selective reporting (reporting bias) | Low | Predefined outcomes of interest are reported in the results section. |
| Other bias | High | Large portion of patients in the IV iron group declined their second dose. |

| Park HS, Kim TY, Kim HJ, Ro YJ, Jang HY, Koh WU. The Effect of Intraoperative Ferric Carboxymaltose in Joint Arthroplasty Patients: A Randomized Trial. J. 2019;8(10):13.10 | | |
| --- | --- | --- |
| Bias | Authors’ judgment (low, unclear, high) | Support for judgment |
| Random sequence generation (selection bias) | Unclear | Eligible patients were randomly assigned into one of two groups through stratified block randomization of a 1:1 ratio. Stratification factors were operation types, because the result of this study may defer amount either TKA or THA. |
| Allocation concealment (selection bias) | Low | The allocation details were concealed in an opaque sealed envelope. After obtaining informed consent from each patient, the envelope was opened y an independent anesthesiologist not involved in this study assessment. |
| Blinding of participants and personnel (performance bias) | High | Study was single blinded (study patient) |
| Blinding of outcome assessment (detection bias) | High | Open label study; assessors likely not blinded |
| Incomplete outcome data (attrition bias) | Unclear | Three patients were withdrawn after subject enrollment, due to uncontrolled hypertension, unexpected cancellation of surgery on the day of operation due to personal reason, and preoperative transfusion. Eight patients were dropped out due to follow-up loss before 1 month after operation (n=5), unnoticed cancer diagnosis (n=1), and patient withdrawal of the consent (n =2). |
| Selective reporting (reporting bias) | Low | All a priori outcomes were reported in results. |
| Other bias | High | There was a limited sample size that resulted in an underpowered study. |

| Richards T, Baikady RR, Clevenger B, Butcher A, Abeysiri S, Chau M, et al. Preoperative intravenous iron to treat anaemia before major abdominal surgery (PREVENTT): a randomised, double-blind, controlled trial. Lancet. 2020;04:04.11 | | |
| --- | --- | --- |
| Bias | Authors’ judgment (low, unclear, high) | Support for judgment |
| Random sequence generation (selection bias) | Low | Randomization was done by trained staff members using a secure web-based service through Clinical Trials Unit at the London School of Hygiene and Tropical Medicine. The web-based service was provided by an independent research support organization. |
| Allocation concealment (selection bias) | Low | Randomisation was 1:1, with allocation concealment that used minimisation, considering baseline haemoglobin (<100 vs ≥100 g/L), age (<70 vs ≥70 years), centre, and operation type. |
| Blinding of participants and personnel (performance bias) | Low | Because IV iron was a dark-brown solution that is easily distinguishable from the saline placebo, dedicated unblinded study personnel were responsible for the preparation and administration of the study drug but had no other involvement in the trial. To ensure blinding of the participants, their skin was swabbed with iodine, and the study treatment was shielded from vision (light protection bags) and infused through black tubing. |
| Blinding of outcome assessment (detection bias) | Low | Study was blinded for clinical personnel. |
| Incomplete outcome data (attrition bias) | Low | Six patients did not receive their intende randomized treamtent (two placebo; four IV iron). Eight patients withdrew consent (four in each group), of whom three withdrew between treatment and surgery, three between surgery and the 8-week visit, and two between the 8-week and 6-month visits. 23 pateints did not undergo their planned surgery (13 placebo, 10 IV iron), not including the three patients who withdrew consent before surgery. 46 patients had their surgery outside the prescribed timelines (26 placebo, 20 IV iron) and 20 pateitns did not have major open abdominal surgery (12 placebo, 8 IV iron). For the coprimary endpoints, 474 (97%) patients were included in the IIT analysis and 388 (80%) were included in the per-protocol analysis. |
| Selective reporting (reporting bias) | Low | Coprimary endpoints were reported as IIT and per-protocol, adjusted for multiple testing, and adjusted for age, sex, body-mass index, operation type, and Hg concentrations. |
| Other bias | Low | None |

**References**

1. Bernabeu-Wittel M, Romero M, Ollero-Baturone M, et al. Ferric carboxymaltose with or without erythropoietin in anemic patients with hip fracture: a randomized clinical trial. *Transfusion (Paris).* 2016;56(9):2199-2211.

2. Bernabeu-Wittel M, Aparicio R, Romero M, et al. Ferric carboxymaltose with or without erythropoietin for the prevention of red-cell transfusions in the perioperative period of osteoporotic hip fractures: a randomized contolled trial. The PAHFRAC-01 project. *BMC Musculoskelet Disord.* 2012;13:27.

3. Bisbe E, Molto L, Arroyo R, Muniesa JM, Tejero M. Randomized trial comparing ferric carboxymaltose vs oral ferrous glycine sulphate for postoperative anaemia after total knee arthroplasty. *Br J Anaesth.* 2014;113(3):402-409.

4. Froessler B, Palm P, Weber I, Hodyl NA, Singh R, Murphy EM. The important role for intravenous iron in perioperative patient blood management in major abdominal surgery: a randomized controlled trial. *Ann Surg.* 2016;264(1):41-46.

5. Keeler BD, Simpson JA, Ng O, Padmanabhan H, Brookes MJ, Acheson AG. Randomized clinical trial of preoperative oral versus intravenous iron in anaemic patients with colorectal cancer. *Br J Surg.* 2017;104(3):214-221.

6. Khalafallah AA, Yan C, Al-Badri R, et al. Intravenous ferric carboxymaltose versus standard care in the management of postoperative anaemia: a prospective, open-label, randomised controlled trial. *The Lancet Haematology.* 2016;3(9):e415-425.

7. Kim YW, Bae JM, Park YK, et al. Effect of intravenous ferric carboxymaltose on hemoglobin response among patients with acute isovolemic anemia following gastrectomy: the FAIRY randomized clinical trial. *JAMA.* 2017;317(20):2097-2104.

8. Lee S, Ryu KJ, Lee ES, Lee KH, Lee JJ, Kim T. Comparative efficacy and safety of intravenous ferric carboxymaltose and iron sucrose for the treatment of preoperative anemia in patients with menorrhagia: An open-label, multicenter, randomized study. *J Obstet Gynaecol Res*. 2019;45(4):858-864. doi:10.1111/jog.13893

9. Padmanabhan H, Siau K, Nevill AM, et al. Intravenous iron does not effectively correct preoperative anaemia in cardiac surgery: a pilot randomized controlled trial. *Interact Cardiovasc Thorac Surg*. 2019;28(3):447-454. doi:10.1093/icvts/ivy226

10. Park HS, Kim TY, Kim HJ, Ro YJ, Jang HY, Koh WU. The Effect of Intraoperative Ferric Carboxymaltose in Joint Arthroplasty Patients: A Randomized Trial. *J Clin Med*. 2019;8(10):1674. Published 2019 Oct 13. doi:10.3390/jcm8101674

11. Richards T, Baikady RR, Clevenger B, et al. Preoperative intravenous iron to treat anaemia before major abdominal surgery (PREVENTT): a randomised, double-blind, controlled trial [published online ahead of print, 2020 Sep 4]. *Lancet*. 2020;396(10259):1353-1361. doi:10.1016/S0140-6736(20)31539-7
